# Supplementary material for: Paracrine effects of haematopoietic cells on human mesenchymal stem cells
Source: PubMed Central journal article supplement (PMC4450757; doi:10.1038/srep10573), 2015-06-01
Supplement: srep10573-s1.pdf [file srep10573-s1.pdf]

# **Paracrine effects of haematopoietic cells on human mesenchymal stem cells**

Shuanhu Zhou

## Supplementary Information

Supplementary Fig. 1

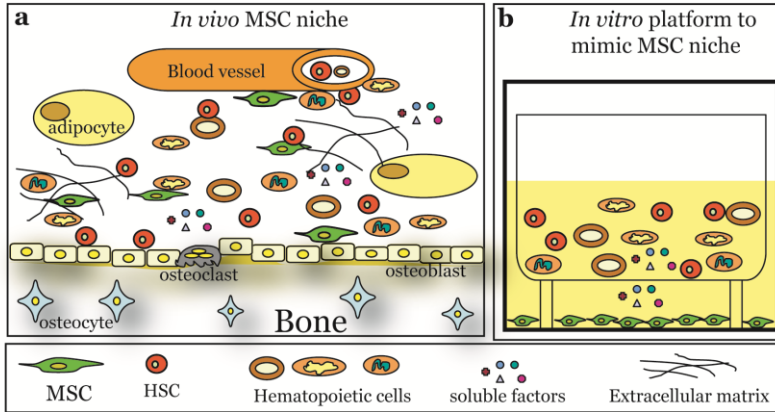

**Supplementary Figure 1.** The niche of human MSCs. **(a)** Bone and blood formation are intertwined in bone marrow, therefore haematopoietic cells and bone cells could be extrinsic factors/niche for each other. **(b)** An *in vitro* transwell co-culture model of haematopoietic cells and MSCs as a platform to mimic the paracrine effects of haematopoietic cells on hMSCs *in vivo*. Human haematopoietic cells were placed in cell culture inserts, and MSCs were cultured on the bottom of the dishes. The 0.4 μm pore size of cell culture insert allows proteins, but not cells, to transport through the polycarbonate membrane.

Supplementary Fig. 2

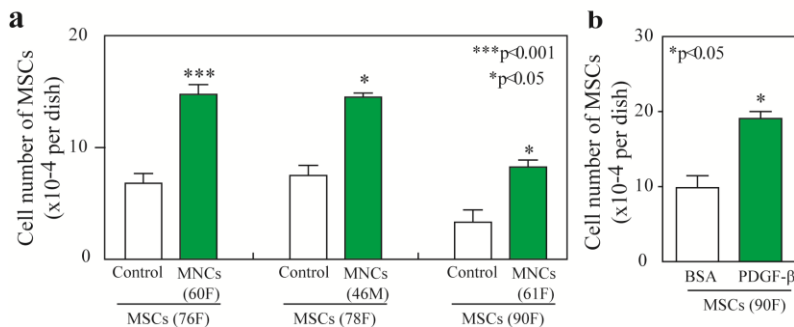

**Supplementary Figure 2.** Haematopoietic cells stimulate proliferation of human MSCs.

Human MSCs were seeded in  $1 \times 10^4$  cells/35 mm dish at day 0 and cell number was accounted at

day 7. **(a)** Human MSCs (76F)  $\pm$  MNCs (60F) (empty controls, n=6, MNCs inserts, n=6,  $p < 0.001$ , t-test); hMSCs (78F)  $\pm$  MNCs (46M) (empty controls, n=3, MNCs inserts, n=4,  $p < 0.05$ , t-test); hMSCs (90F)  $\pm$  MNCs (61F) (empty controls, n=4, MNCs inserts, n=3,  $p < 0.05$ , t-test).

**(b)** After 7 days treatment, 10 ng/mL of PDGF- $\beta$  stimulated proliferation of hMSCs (90F)

(\* $p < 0.05$ , n=3, Mann-Whitney test).

Supplementary Fig. 3

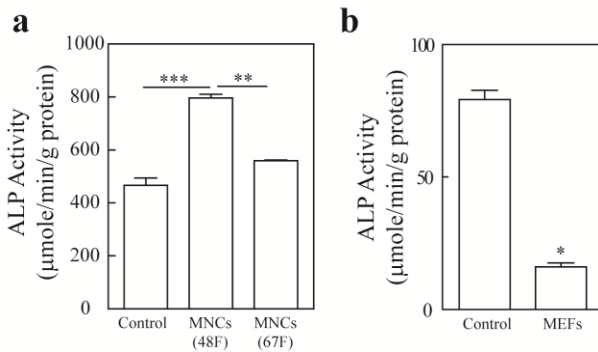

**Supplementary Figure 3.** Haematopoietic cells, but not MEFs, stimulate osteoblast differentiation of human MSCs. **(a)** After 7 days in osteogenic medium, ALP activity of MSCs (76M)  $\pm$  MNCs; MNCs inserts (48F, n=3) vs. empty insert controls (n=11) (\*\* $p < 0.001$ ) or MNCs inserts (67F, n=3) (\*\* $p < 0.01$ ) (ANOVA); there was no significant difference between MNCs inserts (67F) and empty insert controls. **(b)** Effects of MEFs on ALP activity of MSCs (90F); MEFs inserts (n=3) vs. empty insert controls (n=6) (\* $p < 0.05$ , Mann-Whitney Test).

Supplementary Fig. 4

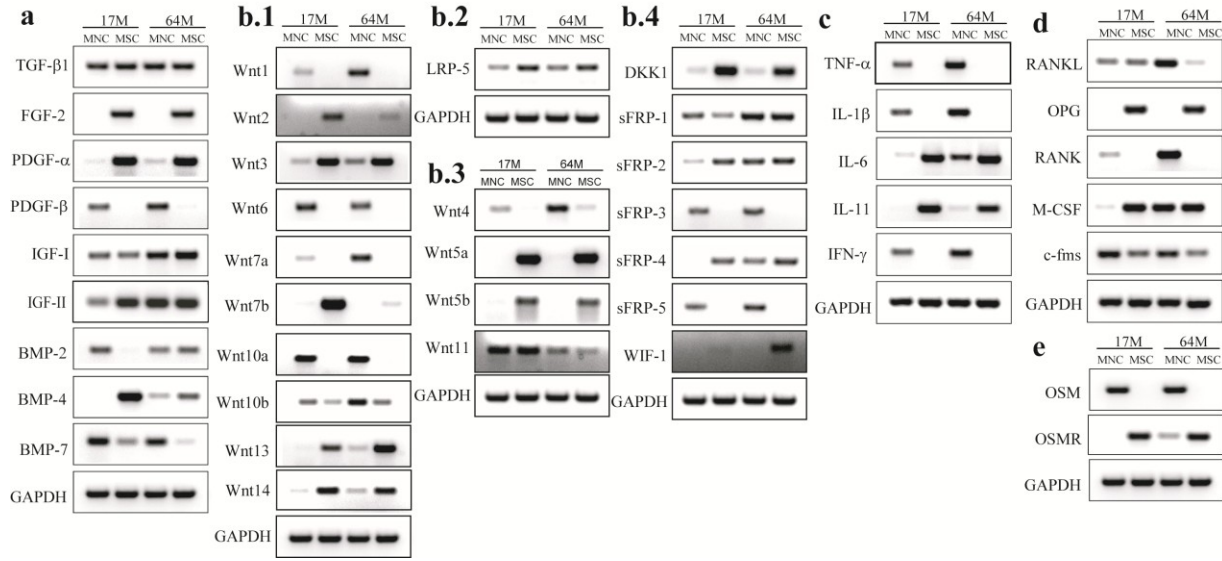

**Supplementary Figure 4.** The gene profile of human MNCs and MSCs. RT-PCR was used to evaluate the gene profile in human MSCs and MNCs obtained from two subjects, a young male (17M) and an old male (64M) subjects. The gene-specific primers (Supplementary Table 1) were used for amplification with Promega GoTaq Flexi DNA Polymerase.

Supplementary Fig. 5

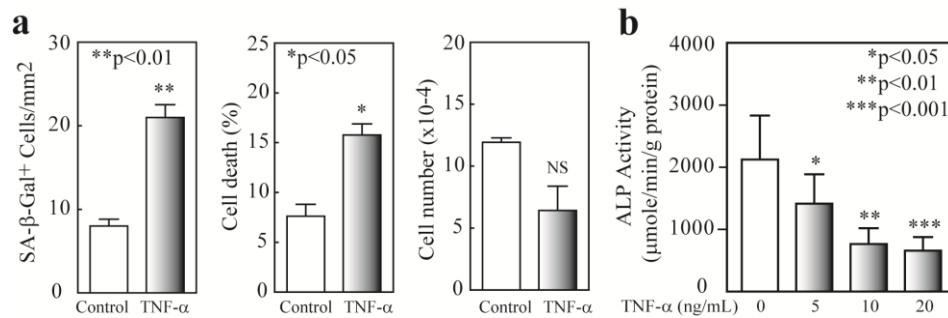

**Supplementary Figure 5.** The effects of TNF- $\alpha$  on human MSCs. (a) Under the same treatment conditions as the described in Figure 5, the effects of TNF- $\alpha$  on SA- $\beta$ -Gal<sup>+</sup> cells (\*\*p<0.01, TNF- $\alpha$ , n=3 vs. control, n=4, t-test), cell death (\*p<0.05, TNF- $\alpha$ , n=3 vs. control, n=3, t-test), and proliferation ( no significant different between TNF- $\alpha$  treatment and control,

n=3) in hMSCs obtained from a 76-year-old male subject. **(b)** TNF- $\alpha$  significantly inhibited ALP activity of hMSCs (47F) in a dose-dependent manner (TNF- $\alpha$  treatments *vs.* control, n=3, ANOVA).

Supplementary Fig. 6

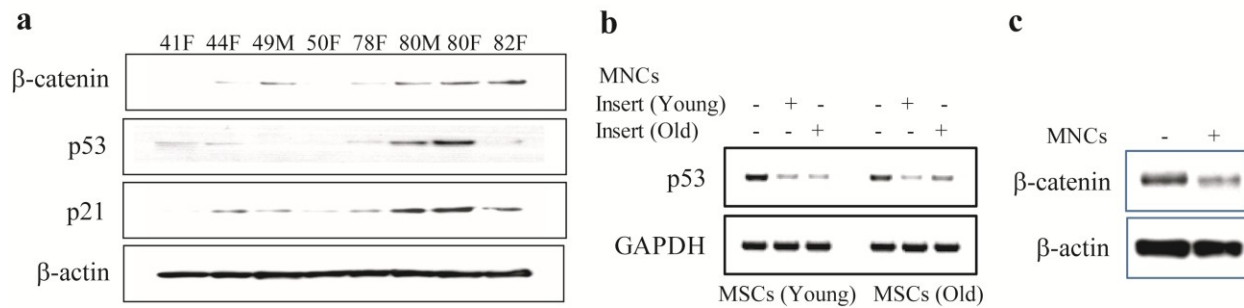

**Supplementary Figure 6.** Effects of age and MNCs on  $\beta$ -catenin, p53 and p21 in hMSCs. **(a)** Western blot showed that the age-related increases in constitutive  $\beta$ -catenin protein levels as well as p53 and p21 protein levels in hMSCs (41-82-year-old subjects). Co-cultures of hMSCs with MNCs showed that **(b)** MNCs (young, 37M; old, 64M) co-culture inserts down-regulated p53 gene expression in hMSCs (young, 37M; old, 64M) after 7 days co-culture and **(c)** MNCs (54M) down-regulated  $\beta$ -catenin protein in hMSCs (21F) after 24 hours co-culture.

Supplementary Fig. 7

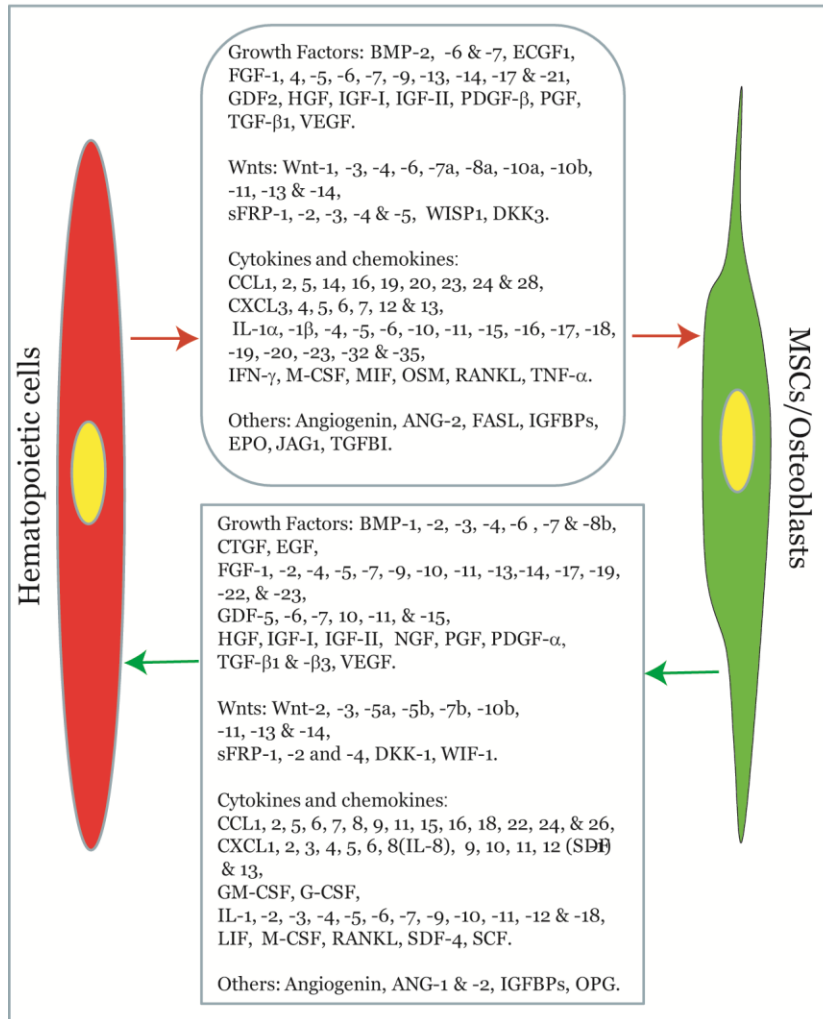

**Supplementary Figure 7.** Summary of the paracrine interactions between haematopoietic cells and mesenchymal stem cells. Secreted factors that may involve the paracrine interactions between haematopoietic cells and MSCs and/or osteoblasts are summarized from our study and literature as listed.

**Abbreviations:** ANG – angiopoietin, BMP- bone morphogenetic proteins, CCL - chemokine (C-C motif) ligand, CTGF - connective tissue growth factor, CXCL - chemokine (C-X-C motif) ligand, DKK – Dickkopf, ECGF - endothelial cell growth factor, EGF - epidermal growth factor,

EPO – erythropoietin, FASL - Fas ligand, FGF - fibroblast growth factors, GDF - growth differentiation factor, GM-CSF - granulocyte-macrophage colony-stimulating factor, G-CSF - granulocyte-colony stimulating factor, HGF - hepatocyte growth factor, IGF - insulin-like growth factor, IGFBP - insulin-like growth factor-binding protein, LIF - leukemia inhibitory factor, IL – Interleukin, INF – Interferon, JAG – jagged, M-CSF - macrophage colony-stimulating factor, MIF - macrophage migration inhibitory factor, NGF - nerve growth factor, OPG – osteoprotegerin, OSM - oncostatin M, PGF - placental growth factor, PDGF - platelet-derived growth factor, RANKL - receptor activator of nuclear factor kappa B ligand, RANK - receptor activator of nuclear factor kappa B, SCF - Stem Cell Factor, SDF-1 - stromal cell-derived factor 1, TGF - transforming growth factor, TGFBI - transforming growth factor, beta-induced, TNF - tumor necrosis factor, VEGF - vascular endothelial growth factor, sFRP - secreted frizzled-related protein, WIP-1 - Wnt inhibitory factor-1, WISP1 - Wnt-1 induced secreted protein 1.

### **References:**

- Bronckaers, A., *et al.* Mesenchymal stem/stromal cells as a pharmacological and therapeutic approach to accelerate angiogenesis. *Pharmacol. Ther.* **143**, 181-196 (2014).
- Korf-Klingebiel, M., *et al.* Bone marrow cells are a rich source of growth factors and cytokines: implications for cell therapy trials after myocardial infarction. *Eur. Heart J.* **29**, 2851-2858 (2008).
- Kupcova Skalnikova H. Proteomic techniques for characterisation of mesenchymal stem cell secretome. *Biochimie.* **95**, 2196-2211 (2013).
- Lorenzo, J., Horowitz, M., Choi, Y. Osteoimmunology: interactions of the bone and immune system. *Endocr. Rev.* **29**, 403-440 (2008).
- Nakashima, T., & Takayanagi, H. Osteoimmunology: crosstalk between the immune and bone systems. *J. Clin. Immunol.* **29**, 555-567 (2009).

- Overman, J. R. *et al.* Growth factor gene expression profiles of bone morphogenetic protein-2-treated human adipose stem cells seeded on calcium phosphate scaffolds *in vitro*. *Biochimie*. **95**, 2304-2313 (2013).
- Pacifici, R. Osteoimmunology and its implications for transplantation. *Am. J. Transplant.* **13**, 2245-2254 (2013).
- Shiozawa, Y., & Taichman, R. S. Getting blood from bone: an emerging understanding of the role that osteoblasts play in regulating hematopoietic stem cells within their niche. *Exp. Hematol.* **40**, 685-694 (2012).
- Taichman, R. S. Blood and bone: two tissues whose fates are intertwined to create the hematopoietic stem-cell niche. *Blood.* **105**, 2631-2639 (2005);



**Supplementary Table 1. PCR primers**

| Gene          | Primer sequence (5'→3')                                                   | Size (bp) | Ref.                                  |
|---------------|---------------------------------------------------------------------------|-----------|---------------------------------------|
| ALP           | F: GCGAACGTATTTCTCCAGACCCAG<br>R: TTCCAAACAGGAGAGTCGCTTCA                 | 367       | Winn <i>et al.</i> , 1999             |
| BMP-2         | F: CATCCCAGCCCTCTGAC<br>R: CTTTCCCACCTGCTTGCA                             | 493       | Moutsatsos <i>et al.</i> , 2001       |
| BMP-4         | F: GACCTATGGAGCCATTCCGTA<br>R: TCAGGGATGCTGCTGAGGTT                       | 585       | M22490*                               |
| BMP-7         | F: 5-TTCCCCTCCCTATCCCCAACTTT-3<br>R: 5-TTTTCTTTTCGCACAGACACC-3            | 313       | Chubinskaya, <i>et al.</i> , 2000     |
| BSP           | F: TCAGCATTTTGGGAATGGCC<br>R: GAGGTTGTTGTCTTCGAGGT                        | 657       | D'Ippolito <i>et al.</i> , 2006       |
| c-fms         | F: CAGATTGGTATAGTCCCGCTCTCT<br>R: TCCAACACTACATTGTCAAGGGCAAT              | 360       | Kirma <i>et al.</i> , 2007            |
| COL I         | F: GGGTGACCGTGGTGAGA<br>R: CCAGGAGAGCCAGAGGTCC                            | 194       | Büttner <i>et al.</i> , 2004          |
| DKK1          | F: TGGAATATGTGTGTCTTCTG<br>R: AACCTTCTTGTCCTTTGGTG                        | 155       | Mueller <i>et al.</i> , 2005          |
| FGF-2         | F: GGCTTCTTCCTGCGCATCCA<br>R: GCTCTTAGCAGACATTGGAAGA                      | 352       | Baguma-Nibasheka <i>et al.</i> , 2007 |
| IGF-I         | F: TGGGCTTGCGGCCACGTA<br>R: AGAGCCTGCGCAATGGAATAAA                        | 533       | Gordeladze <i>et al.</i> , 2002       |
| IGF-II        | F: CTGTGCTACCCCGCCAAGT<br>R: ACGTTTGGCCTCCCTGAACG                         | 214       | Sayer <i>et al.</i> , 2005            |
| IL-1 $\beta$  | F: CATGGACAAGCTGAGGAAGA<br>R: TTCAACACGCAGGACAGGTA                        | 370       | Hennige <i>et al.</i> , 2008          |
| IL-6          | ATGAACTCCTTCTCCACAAGCGC<br>GAAGAGCCCTCAGGCTGGACTG                         | 627       | Stark <i>et al.</i> , 1993            |
| IL-11         | F: ACTGCTGCTGCTGAAGACTCGGCTGTGA<br>R: ATGGGGAAGAGCCAGGGCAGAAGTCTGT        | 321       | Suen <i>et al.</i> , 1994             |
| IFN- $\gamma$ | F: GCGAAAAAGGAGTCAGATGC<br>R: CAAACCGGCAGTAACTGGAT                        | 417       | NM_000619.2#                          |
| GAPDH         | F: ACCACAGTCCATGCCATCAC<br>R: TCCACCACCTGTTGCTGTA                         | 451       | Pattyn <i>et al.</i> , 2003           |
| LRP-5         | F: CTTCCAGTTTTCCAAGGGA<br>R: AGTCCACAATGATCTTCCGGGT                       | 366       | Zhou <i>et al.</i> , 2004             |
| M-CSF         | F:ATGACAGACAGGTGGAAGTCCAGTGTAGAGG<br>R: TCACACAACCTCAGTAGGTTTCAGGTGATGGGC | 495       | Clontech                              |
| OPG           | F: GAACCCCAGAGCGAAATACA<br>R: CGCTGTTTTACAGAGGTCA                         | 441       | Makhluf <i>et al.</i> , 2000          |
| OSM           | F: CGTATCCAAGGCCTGGATGTT<br>R: GCCCTCCAGCTTGCCTGAAA                       | 393       | Huang <i>et al.</i> , 2009            |
| OSMR          | F:GGAGGAAGTCAGTGTACAAGA<br>R: TACAGTGCAAAGTCTTGAAGTC                      | 362       | Götherström <i>et al.</i> , 2010      |
| PDGF $\alpha$ | F: CTGGAGATAGACTCCGT<br>R: CCTGACGTATTCCACCT                              | 335       | Yoshida <i>et al.</i> , 1992          |

|        |                                                            |     |                                    |
|--------|------------------------------------------------------------|-----|------------------------------------|
| PDGFβ  | F: CCCGGAGTCGGCATGAA<br>R: TTTCTCACCTGGACAGGTCG            | 475 | Yoshida <i>et al.</i> ,<br>1992    |
| RANK   | F: CCTACGCACAAGGCGAAGATGC<br>R: CGTAGACCACGATGATGTGCGCC    | 702 | Atkins <i>et al.</i> ,<br>2000     |
| RANKL  | F: ATCCCATCTGGTTCCATAA<br>R: CCCTGACCAATACTTGGTGC          | 276 | Eslami <i>et al.</i> , 2011        |
| RUNX2  | F: GTTTGTCTCTGACCGCCTC<br>R: CCAGTTCTGAGGCACCTGAAA         | 317 | D'Ippolito <i>et al.</i> ,<br>2006 |
| sFRP-1 | F: TACGTACCTGGTGGACATGC<br>R: AAGGACGTGCCGATAAACAG         | 497 | Yates, 2004                        |
| sFRP-2 | F: CTAGCGCCGCTCTTCGTGTACCTG<br>R: CAGCGTCTTGCCCAGCAGATCCA  | 386 | Yates, 2004                        |
| sFRP-3 | F: GGATCGGTGTTTTTCAGCATT<br>R: CCGTGGTAGCTGCTCACTTT        | 501 | Yates, 2004                        |
| sFRP-4 | F: AACTTTCACACCGCTCATCC<br>R: GATATCCTTTCCCGGCCTAC         | 602 | Yates, 2004                        |
| sFRP-5 | F: TTCATGTGCCTGGTGGTGGGC<br>R: TACACGTGCGACAGGGACACC       | 235 | Yates, 2004                        |
| TERT   | F: AGCCAGTCTCACCTTCAACCGC<br>R: GGAGTAGCAGAGGGAGGCCG       | 272 | D'Ippolito <i>et al.</i> ,<br>2006 |
| TGF-β1 | F: CAGAAATACAGCAACAATTCCTGG<br>R: TTGCAGTGTGTTATCCGTGCTGTC | 186 | Nagineni <i>et al.</i> ,<br>2002   |
| TNF-α  | F: GCGTGGAGCTGAGAGATAAC<br>R: GATGTTTCGTCCTCCTCACAG        | 360 | Hennige <i>et al.</i><br>2008      |
| TNFR1  | F: ACCAAGTGCCACAAAGGAAC<br>R: CTGCAATTGAAGCACTGGAA         | 263 | Sawanobori <i>et al.</i> ,<br>2003 |
| TNFR2  | F: TTCGCTCTTCCAGTTGGACT<br>R: CACCAGGGGAAGAATCTGAG         | 399 | Sawanobori <i>et al.</i> ,<br>2003 |
| WIF-1  | F: CCGAAATGGAGGCTTTTGTGA<br>R: GTGTCTTCCATGCCAACCTT        | 451 | Lin <i>et al.</i> , 2006           |
| Wnt1   | F: TGCACGCACACGCGCTACTGCAC<br>R: CAGGATGGCAAGAGGGTTCATG    | 246 | Katoh, 2003                        |
| Wnt2   | F: AAAGGAAAGGATGCCAGAGC<br>R: CCCACAGCACATGACTTCAC         | 398 | Yates, 2004                        |
| Wnt3   | F: GSCCACATGCACCTCAAATG<br>R: GATGCAGTGGCATTTCCT           | 401 | Yates, 2004                        |
| Wnt4   | F: ACCTGGAAGTCATGGACTCG<br>R: GCCTCATTGTTGTGGAGTT          |     | Yates, 2004                        |
| Wnt5a  | F: CCAACTGGCAGGACTTTCTC<br>R: GCAAAGCGGTAGCCATAGTC         | 368 | Yates, 2004                        |
| Wnt5b  | F: AGATCGTGGACCAGTACATCTG<br>R: TTACGGAACCCATCTACATTCTG    | 504 | Saitoh and Katoh,<br>2002          |
| Wnt6   | F: AGAAGCTGCCTCCATTTCCG<br>R: GTCACAGGCAGAGGCTGAG          | 386 | Yates, 2004                        |
| Wnt7a  | F: GAGAAGCAAGGCCAGTACCA<br>R: TAGTTGGGCGACTTCTCGAT         | 424 | Yates, 2004                        |
| Wnt7b  | F: GAGCCAACATCATCTGCAAC<br>R: GGAGAAGTTCGATGCCGTAAC        | 391 | Yates, 2004                        |
| Wnt10a | F: CCAATGACATTCTGGACCT<br>R: TAAGCGGTGCAGCTTCCTAC          | 410 | Yates, 2004                        |

|        |                                                         |     |             |
|--------|---------------------------------------------------------|-----|-------------|
| Wnt10b | F: GAATGCGAATCCACAACAACAG<br>R: TTGCGGTTGTGGGTATCAATGAA | 195 | Yates, 2004 |
| Wnt11  | F: CGTGTGCTATGGCATCAAGT<br>R: CGCATCAGTTTATTGGCTTG      | 509 | Yates, 2004 |
| Wnt13  | F: AAGATGGTGCCAACTTCACCG<br>R: CTGCCTTCTTGGGGGCTTTGC    | 320 | Yates, 2004 |
| Wnt14  | F: GGGTGTGAAGGTGATCAAGG<br>R: CACCCGGCTCTGTGTGTTAT      | 396 | Yates, 2004 |

Note: F = Forward, R = Reverse. \* Designed with Primer3 program. #Designed with Primer-BLAST.

### Supplementary Reference:

Atkins, G. J., Haynes, D. R., Graves, S. E., *et al.* Expression of osteoclast differentiation signals by stromal elements of giant cell tumors. *J. Bone Miner. Res.* **15**, 640-649 (2000).

Baguma-Nibasheka, M., Barclay, C., Li, A. W., Geldenhuys, L., Porter, G. A., Blay, J., Casson, A. G., Murphy, P. R. Selective cyclooxygenase-2 inhibition suppresses basic fibroblast growth factor expression in human esophageal adenocarcinoma. *Mol. Carcinog.* **46**, 971-980 (2007).

Büttner, C., Skupin, A., Rieber, E. P. Transcriptional activation of the type I collagen genes COL1A1 and COL1A2 in fibroblasts by interleukin-4: analysis of the functional collagen promoter sequences. *J. Cell. Physiol.* **198**, 248-258 (2004).

Chubinskaya, S., Merrihew, C., Cs-Szabo, G., Mollenhauer, J., McCartney, J., Rueger, D. C., Kuettner, K. E. Human articular chondrocytes express osteogenic protein-1. *J. Histochem. Cytochem.* **48**, 239-250 (2000).

D'Ippolito, G., Diabira, S., Howard, G. A., Roos, B. A., Schiller, P. C. Low oxygen tension inhibits osteogenic differentiation and enhances stemness of human MIAMI cells. *Bone* **39**, 513-522 (2006).

- Eslami, B., Zhou, S., Van Eekeren, I., *et al.* Reduced osteoclastogenesis and RANKL expression in marrow from women taking alendronate. *Calcified Tissue Intl.* **88**, 272-280 (2011).
- Gordeladze, J. O., Drevon, C. A., Syversen, U., Reseland, J. E. Leptin stimulates human osteoblastic cell proliferation, de novo collagen synthesis, and mineralization: Impact on differentiation markers, apoptosis, and osteoclastic signaling. *J. Cellular Biochem.* **85**, 825-836 (2002).
- Götherström, C., Chan, J., O'Donoghue, K., Fisk, N. M. Identification of candidate surface antigens for non-invasive prenatal diagnosis by comparative global gene expression on human fetal mesenchymal stem cells. *Mol. Hum. Reprod.* **16**, 472-480 (2010).
- Hennige, A. M., Staiger, H., Wicke, C., Machicao, F., Fritsche, A., Häring, H. U., Stefan, N. Fetuin-A induces cytokine expression and suppresses adiponectin production. *PLoS One* **3**, e1765 (2008).
- Huang, F. M., Tsai, C. H., Yang, S. F., Chang, Y. C. The upregulation of oncostatin M in inflamed human dental pulps. *Int. Endod. J.* **42**, 627-631 (2009).
- Kato, M. Expression and regulation of WNT1 in human cancer: up-regulation of WNT1 by  $\beta$ -estradiol in MCF-7 cells. *Int. J. Oncol.* **22**, 209-212 (2003).
- Kirma, N., Hammes, L. S., Liu, Y. G., Nair, H. B., Valente, P. T., Kumar, S., Flowers, L. C., Tekmal, R. R. Elevated expression of the oncogene c-fms and its ligand, the macrophage colony-stimulating factor-1, in cervical cancer and the role of transforming growth factor-beta1 in inducing c-fms expression. *Cancer Res.* **67**, 1918-1926 (2007).

- Lin, Y.C., You, L., Xu, Z., He, B., Mikami, I., Thung, E., Chou, J., Kuchenbecker, K., Kim, J., Raz, D., Yang, C. T., Chen, J. K., Jablons, D. M. Wnt signaling activation and WIF-1 silencing in nasopharyngeal cancer cell lines. *Biochem. Biophys. Res. Commun.* **341**, 635-40 (2006).
- Makhluf, H. A., Mueller, S. M., Mizuno, S., Glowacki, J. Age-related decline in osteoprotegerin expression by human bone marrow cells cultured in three-dimensional collagen sponges. *Biochem. Biophys. Res. Commun.* **268**, 669-672 (2000).
- Moutsatsos, I. K., Turgeman, G., Zhou, S., Kurkalli, B. G., Pelled, G., Tzur, L., Kelley, P., Stumm, N., Mi, S., Müller, R., Zilberman, Y., Gazit, D. Exogenously regulated stem cell-mediated gene therapy for bone regeneration. *Mol Ther.* **3**, 449-461 (2001).
- Mueller, W., Lass, U., Wellmann, S., Kunitz, F., von Deimling, A. Mutation analysis of DKK1 and in vivo evidence of predominant p53-independent DKK1 function in gliomas. *Acta Neuropathol.* **109**, 314-320 (2005).
- Naginei, C. N., Detrick, B., Hooks, J. J. Transforming growth factor- $\beta$  expression in human retinal pigment epithelial cells is enhanced by *Toxoplasma gondii*: a possible role in the immunopathogenesis of retinochoroiditis. *Clin. Exp. Immunol.* **128**, 372-378 (2002).
- Pattyn, F., Speleman, F., De Paepe, A., Vandesompele, J. RTPrimerDB: the real-time PCR primer and probe database. *Nucleic Acids Res.* **31**, 122-123 (2003).
- Sawanobori, M., Yamaguchi, S., Hasegawa, M., Inoue, M., Suzuki, K., Kamiyama, R., Hirokawa, K., Kitagawa, M. Expression of TNF receptors and related signaling molecules in the bone marrow from patients with myelodysplastic syndromes. *Leuk. Res.* **27**, 583-591 (2003).
- Sayer, R. A., Lancaster, J. M., Pittman, J., Gray, J., Whitaker, R., Marks, J. R., Berchuck, A. High insulin-like growth factor-2 (IGF-2) gene expression is an independent predictor of poor survival for patients with advanced stage serous epithelial ovarian cancer. *Gynecol.*

*Oncol.* **96**, 355-361 (2005).

Saitoh, T., Katoh, M. Expression and regulation of WNT5A and WNT5B in human cancer: up-regulation of WNT5A by TNFalpha in MKN45 cells and up-regulation of WNT5B by beta-estradiol in MCF-7 cells. *Int. J. Mol. Med.* **10**, 345-349 (2002).

Stark, R., Andre, C., Thierry, D., Chereil, M., Galibert, F., Gluckman, E. The expression of cytokine and cytokine receptor genes in long-term bone marrow culture in congenital and acquired bone marrow hypoplasias. *Br. J. Haematol.* **83**, 560-566 (1993).

Suen, Y., Chang, M., Lee, S. M., Buzby, J. S., Cairo, M. S. Regulation of interleukin-11 protein and mRNA expression in neonatal and adult fibroblasts and endothelial cells. *Blood* **84**, 4125-4134 (1994).

Winn, S. R., Randolph, G., Uludag, H., Wong, S. C., Hair, G. A., Hollinger, J. O. Establishing an immortalized human osteoprecursor cell line: OPC1. *J. Bone Miner. Res.* **14**, 1721-1733 (1999).

Yates, K. E. Demineralized bone alters expression of Wnt network components during chondroinduction of post-natal fibroblasts. *Osteoarthritis Cartilage* **12**, 497-505 (2004).

Yoshida, M., Tanihara, H., Yoshimura, N. Platelet-derived growth factor gene expression in cultured human retinal pigment epithelial cells. *Biochem. Biophys. Res. Commun.* **189**, 66-71 (1992).

Zhou, S., Eid, K., Glowacki, J. Cooperation between TGF- $\beta$  and Wnt pathways during chondrocyte and adipocyte differentiation of human marrow stromal cells. *J. Bone Miner. Res.* **19**, 463-470 (2004).
